1 **Phage-Derived Depolymerase as an Antibiotic Adjuvant Against**  
2 **Multidrug-Resistant *Acinetobacter Baumannii***

3

4 Xi Chen<sup>a</sup>, Miao Liu<sup>a</sup>, Pengfei Zhang<sup>b</sup>, Miao Xu<sup>b</sup>, Weihao Yuan<sup>c</sup>, Liming Bian<sup>c</sup>, Yannan  
5 Liu<sup>d,\*</sup>, Jiang Xia<sup>a,\*</sup>, Sharon S.Y. Leung<sup>b,\*</sup>

6

7 <sup>a</sup>Department of Chemistry, The Chinese University of Hong Kong, Shatin, Hong Kong, China

8 <sup>b</sup>School of Pharmacy, The Chinese University of Hong Kong, Shatin, Hong Kong, China

9 <sup>c</sup>Department of Biomedical Engineering, The Chinese University of Hong Kong, Shatin, Hong Kong, China

10 <sup>d</sup>Emergency Medicine Clinical Research Center, Beijing Chao-Yang Hospital, Capital Medical University,  
11 Beijing, China

12

13 \*To whom correspondence may be addressed. Email: Sharon Shui Yee Leung,  
14 [sharon.leung@cuhk.edu.hk](mailto:sharon.leung@cuhk.edu.hk), Jiang Xia, [jiangxia@cuhk.edu.hk](mailto:jiangxia@cuhk.edu.hk) and Yannan Liu,  
15 [yannan\\_liu@foxmail.com](mailto:yannan_liu@foxmail.com).

16

17

18

19 **Competing interest statement:** The authors declare no competing interests.

20

21

22

23

24 **ABSTRACT**

25 Bacteriophage-encoded depolymerases are responsible for degrading capsular  
26 polysaccharides (CPS), lipopolysaccharides (LPS) and exopolysaccharides (EPS) of the host  
27 bacteria during phage invasion. They have been considered as promising antivirulence agents  
28 in controlling bacterial infections, including those caused by drug-resistant bacteria. This  
29 feature inspires a hope of utilizing these enzymes to disarm the polysaccharide capsid of the  
30 bacterial cells, which then strengthens the action of antibiotics. Here we have identified,  
31 cloned, and expressed a depolymerase Dpo71 from a bacteriophage specific for the  
32 gram-negative (G-ve) bacterium *Acinetobacter baumannii* in the heterologous host *E. coli*.  
33 Dpo71 sensitizes the multidrug-resistant (MDR) *A. baumannii* to the host immune attack, and  
34 also acts as an adjuvant to assist or boost the action of antibiotics, for example colistin.  
35 Specifically, Dpo71 at 10 µg/ml enables a complete bacterial eradication by human serum at  
36 50% volume ratio. Dpo71 inhibits biofilm formation and disrupts the pre-formed biofilm.  
37 Combination of Dpo71 could significantly enhance the antibiofilm activity of colistin, and  
38 improve the survival rate of *A. baumannii* infected *Galleria mellonella*. Dpo71 retains the  
39 strain-specificity of the parent phage from which Dpo71 is derived: the phage-sensitive *A.*  
40 *baumannii* strains respond to Dpo71 treatment, whereas the phage-insensitive strains do not.  
41 This indicates that Dpo71 indeed is responsible for the host specificity of bacteriophages. In  
42 summary, our work demonstrates the feasibility of using recombinant depolymerases as an  
43 antibiotic adjuvants to supplement the development of new antibacterials and to battle against  
44 MDR pathogens.

45

46 **KEYWORDS**

47 Depolymerase, exopolysaccharides degrading, antibiotic adjuvant, serum killing, biofilm  
48 prevention and degradation

49

50

51

52

## 53 INTRODUCTION

54 Carbapenem-resistant *Acinetobacter baumannii* was identified as number one priority  
55 pathogen by the World Health Organization (WHO) in 2017 [1, 2]. *A. baumannii* infection is  
56 associated with frequent and hard-to-treat infections, such as pneumonia, bacteremia, urinary  
57 tract infections, meningitis and wound infections [3]. In the past-decades, outbreaks of *A.*  
58 *baumannii* resistant to the last-resort antibiotics, such as colistin, are increasingly reported [4,  
59 5]. Alarmingly, the development of novel antibiotics have experienced significant setbacks in  
60 recent years [6], and thereby the field is urgently calling for novel antibacterial agents to  
61 address the clinical challenges of *A. baumannii* associated infections.

62 Bacteriophages (phages), natural co-evolving bacteria killers, are being revitalized to combat  
63 multidrug-resistant (MDR) bacteria [7]. Although regarded as a promising alternative to  
64 conventional antibiotics, phage therapy faces challenges as all the completed clinical trials  
65 failed to confirm the efficacy. The narrow host range and the development of  
66 phage-resistance could be the major factors for such failures. The viral nature of phage may  
67 also be unacceptable to most clinicians and the general public [8–10]. Alternatively,  
68 researchers explore the potential of phage-encoded enzymes, including the peptidoglycan  
69 hydrolases (PGH), polysaccharide depolymerases, and holins, as novel antibacterial agents,  
70 drawing inspiration from the life cycle of phage. In contrast to phages, phage-encoded  
71 enzymes, as therapeutic proteins without replicating capability are more manageable and  
72 acceptable [11–14].

73 Phage-encoded depolymerases are polysaccharide hydrolases or lyases responsible for  
74 stripping bacterial polysaccharides, including exopolysaccharides (EPS), capsular  
75 polysaccharides (CPS), and lipopolysaccharide (LPS), to facilitate the parent phage to inject  
76 its DNA materials into the bacterial host [13, 14]. Distinct from other phage-encoded  
77 enzymes, depolymerases do not lyse bacterial cells directly. Instead, they disintegrate the  
78 CPS of bacteria to make them susceptible to host immune attack and antibacterial treatment  
79 [15]. Recombinant depolymerases have been shown to protect mice from fatal systemic  
80 bacterial infection [16, 17] and to disrupt biofilms for enhanced antimicrobial activity [18–  
81 22].

82 Combined administration of depolymerases and antibiotics will produce superior antibacterial  
83 efficacy – expected but not yet well-supported by experiments. Bansal *et al.* were the first to

84 report the synergistic use of a depolymerase derived from *Aeromonas punctata* (a facultative  
85 anaerobic G-ve bacterium) with gentamicin in treating mice infected with non-lethal dose of  
86 *K. pneumonia* [23]. Intranasal administration and intravenous administration of the  
87 combination for lung infection and systemic infection, respectively, both reduced bacterial  
88 counts significantly more than the single-agent treatments. They attributed the improved  
89 bacterial killing efficiency to the enhanced bacterial susceptibility towards gentamicin after  
90 the bacteria were decapsulated by the depolymerase. Depolymerases also effectively  
91 dispersed the EPS matrix in *K. pneumonia* biofilms to facilitate the penetration of gentamicin  
92 [24]. A similar synergy was also observed in the treatment of *K. pneumonia* biofilms using  
93 the Dep42 depolymerase and polymixn B [25]. On the contrary, Latka *et al.* showed that the  
94 KP34p57 depolymerase had no impact on the activity of ciprofloxacin, but could  
95 significantly enhance the antibiofilm efficiency of non-depolymerase-producing phages [26].  
96 Depolymerase could also enhance the antibiofilm efficacy of a phage-encoded antibacterial  
97 enzyme endolysin [27].

98 Currently, a few *A. baumannii* depolymerases have been identified [20, 28–32]. Whether they  
99 would work synergistically with antibiotics in controlling biofilm-associated infections, like  
100 those observed for *K. pneumonia*, remains questionable. In the present study, the  
101 combinational effects of a depolymerase Dpo71 encoded by a lytic *A. baumannii* phage,  
102 vB\_AbaM-IME-AB2 (IME-AB2 in short), [33] with serum or colistin in targeting MDR *A.*  
103 *baumannii* are evaluated for the first time.

104

## 105 **RESULTS**

### 106 **Identification and characterization depolymerase Dpo71**

107 The IME-AB2 phage exhibits plaque surrounded by a halo-zone, suggesting the presence of a  
108 depolymerase protein. Bioinformatic analysis reveals that gp71 is a tailspike protein [34] with  
109 43% sequence similarity as the depolymerase encoded by another *Acinetobacter* phage  
110 vB\_AbaP\_AS12 (Protein Data Bank number 6EU4) (**Fig. 1A**). Expression of the ORF71  
111 sequence in *E. coli*. yields a protein with more than 95% purity and a molecular mass of  
112 about 80 kDa (**Fig. 1B**), matching the calculated value of 80.2 kDa. Size exclusion  
113 chromatography shows that the purified Dpo71 elutes as a single peak at a molecular weight  
114 larger than 200 kDa (**Fig. 1C**). This corresponds to a trimer, consistent with the expected  
115 oligomeric form of phage tail fiber protein which is believed to endure extreme conditions for  
116 phage infection and survival [30, 35]. Circular dichroism (CD) reveals that the Dpo71 protein

117 adopts a well-folded conformation rich in  $\beta$ -sheet structures with a negative dichroic  
118 minimum at 215-nm and a positive maximum around 195-nm characteristic peaks (**Fig. 1D**).  
119 The melting curves following the CD signal at 215 nm show a melting temperature ( $T_m$ ) of  
120 58.5 °C (**Fig. 1E**). Spot tests were performed next to confirm the ability of Dpo71 in  
121 degrading bacterial capsules of the host bacteria MDR-AB2 of the parent phage. Semi-clear  
122 spot formation was observed on the bacterial lawn with the spot sizes increasing with the  
123 dose of depolymerase from 0.001  $\mu$ g to 10  $\mu$ g range (**Fig. 1F**). The EPS degradation activity  
124 of Dpo71 was also confirmed by the reduced EPS concentration and Alcian blue staining  
125 (**Fig. S1**) using protocols documented in previous studies [36, 37].

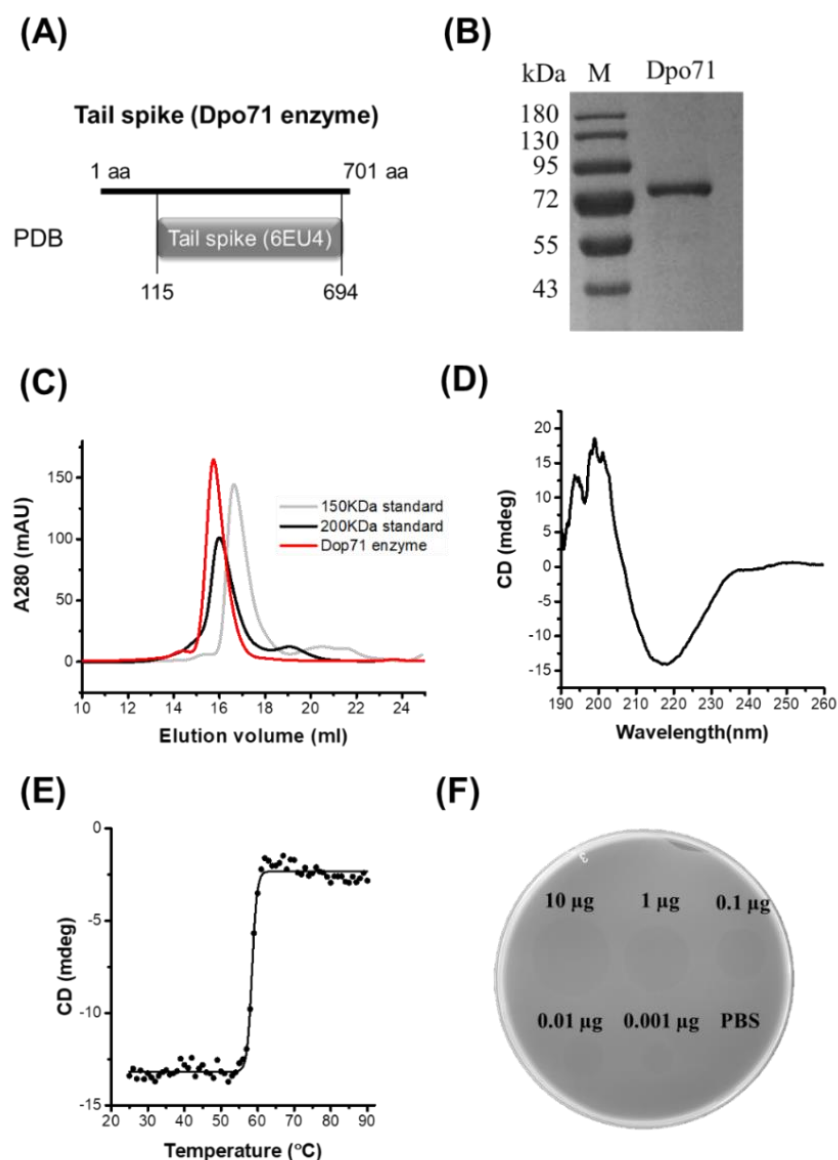

126

127 **FIG 1** Identification and characterization of Dpo71 depolymerase. (A) Bioinformatic analysis  
128 indicates the gp71 gene of the IME-AB2 phage. (B) SDS gel electrophoresis analysis of  
129 purified Dpo71 and a standard molecular mass marker (Lane M). (C) Size exclusion

130 chromatography of purified depolymerase protein. (D) Circular dichroism analysis of Dpo71  
131 measured in the far-UV (190 to 260 nm). (E) Melting curve of Dpo71 acquired at 215 nm  
132 from 20 to 90°C. (F) Spot test assay of Dpo71 against *A. baumannii* lawn (0.001µg to 10 µg).

### 133 Robustness of Dpo71 upon administration and storage

134 To evaluate the therapeutic applicability of Dpo71, the enzymatic activity of Dpo71 at  
135 various pH was evaluated by monitoring the turbidity of the residual EPS. **Fig. 2A** shows the  
136 enzyme remained active in the range of pH 4 to 8, covering most of the physiological  
137 conditions. Then we measured the toxicity of Dpo71 to mammalian cells, human red blood  
138 cells and lung bronchial epithelial cell line (BESA-2B cells). No haemolytic activity was  
139 detected even at a high dose of 500 µg /ml (**Fig. 2B**). **Fig. 2C** also shows Dpo71 has no  
140 cytotoxicity against BESA-2B cells. The result suggests that Dpo71 may be a safe treatment,  
141 likely for systemic or pulmonary infections. As stability upon storage is critical for the  
142 development of commercially viable protein therapeutics, the storage stability of Dpo71 at  
143 4 °C has been evaluated. Results show that Dpo71 is stable for at least 6 months without  
144 noticeable activity loss (**Fig. 2D**).

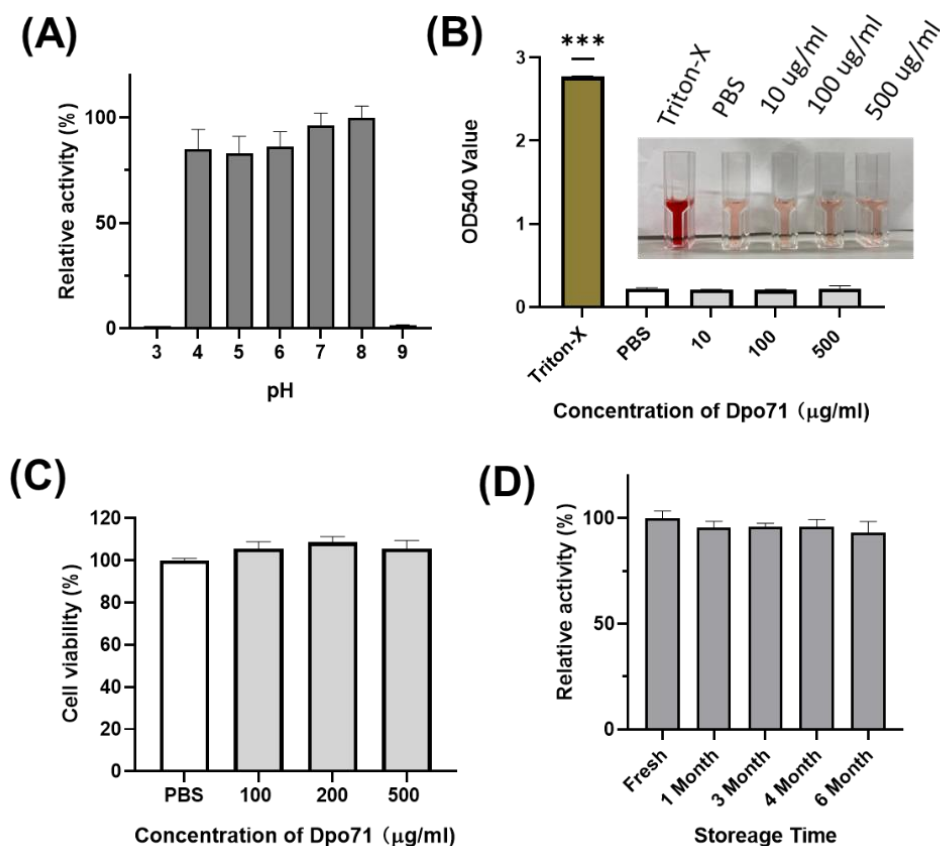

145

146 **FIG 2** Stability and toxicity of Dpo71. (A) The effect of pH on Dpo71 depolymerase activity.  
147 CPC turbidity assay was used to measure the EPS degradation activity, the highest activity at  
148 pH 8 was set as 100%. (B) Hemolysis of red blood cell by Dpo71. PBS and 0.1% Triton

149 X-100 in PBS as the negative and positive controls, respectively. \*\*\* indicated  $P < 0.001$ . (C)  
150 Cytotoxicity of Dpo71 against human cells (BESA-2B). (D) Stability of Dpo71 after storing  
151 at 4 °C for specific month. The EPS degradation activity of fresh opened enzyme was set as  
152 100%. Data are expressed as means  $\pm$  SD (n = 5).

153 One of the limitations of phage therapy is known to be the development of resistance. So, we  
154 next evaluated whether Dpo71 can induce resistance development. The MDR-AB2 strain was  
155 challenged with the parent IME-AB2 phage, Dpo71 or PBS for 24 h and tested for the  
156 emergence of resistant phenotypes (**Table 1**). Ten bacterial colonies of each culture were  
157 selected to estimate the sensitivity to the phage or Dpo71 using the spot test assay.  
158 Representative spot test figures are shown in **Fig. S2**. PBS treated bacteria all remained  
159 sensitive to both the IME-AB2 phage and Dpo71. Pre-challenged with IME-AB2 phage  
160 resulted in resistance to both the phage and Dpo71 afterwards. Although Dpo71 was  
161 originated from the same phage, all ten bacterial colonies tested remained susceptible to the  
162 enzyme without resistance development. This observation also agrees with the findings  
163 reported by *Oliveira et al.* [31, 37]. These data, although preliminary, show that Dpo71 as a  
164 therapeutic option is less likely to induce resistance than phages.

165 **Table 1.** Bacterial resistance table of depolymerase Dpo71 on *A. baumannii* (+ indicating  
166 sensitive; - indicating insensitive).

| No. of isolates | Incubation with PBS |       | Incubation with Phage |       | Incubation with Dpo71 |       |
|-----------------|---------------------|-------|-----------------------|-------|-----------------------|-------|
|                 | Phage               | Dpo71 | Phage                 | Dpo71 | Phage                 | Dpo71 |
| 1               | +                   | +     | -                     | -     | +                     | +     |
| 2               | +                   | +     | -                     | -     | +                     | +     |
| 3               | +                   | +     | -                     | -     | +                     | +     |
| 4               | +                   | +     | -                     | -     | +                     | +     |
| 5               | +                   | +     | -                     | -     | +                     | +     |
| 6               | +                   | +     | -                     | -     | +                     | +     |
| 7               | +                   | +     | -                     | -     | +                     | +     |
| 8               | +                   | +     | -                     | -     | +                     | +     |
| 9               | +                   | +     | -                     | -     | +                     | +     |
| 10              | +                   | +     | -                     | -     | +                     | +     |

167

### 168 Sensitizing bacteria to serum killing and antibiotic

169 As depolymerase can disintegrate bacterial capsules and thus sensitize bacteria to kill by host  
170 immune system [35, 38, 39], we first measured whether serum could kill the Dpo71-treated  
171 bacterial cells. Two *A. baumannii* strains (AB#1 and AB#2) sensitive to the parent IME-AB2  
172 phage and other two insensitive (AB#3 and AB#4) strains were chosen for the serum killing



173 assays (**Table S1**). The four tested strains were resistant to serum killing and continue to  
174 grow in human serum without the presence of depolymerase. Bacteria treated with 10 µg/ml  
175 Dpo71 and inactivated serum also showed no antibacterial effect (**Fig. 3A**). On the contrary,  
176 a remarkable bacterial reduction (8 log) was noted for the two sensitive strains (AB#1 and  
177 AB#2), but not for the insensitive ones (AB#3 and AB#4) when the bacteria were treated  
178 with active human serum (with a volume ratio of 50%) and Dpo71 (**Fig. 3A**). Furthermore,  
179 the time killing assay on the two sensitive strains was performed with a serum ratio of 1% to  
180 50%. Complete bacterial eradication was observed after a five-hour treatment at 50% human  
181 serum for both AB#1 and AB#2 (**Fig. 3B** and **S3**). It is noteworthy that a 5% serum was  
182 sufficient to achieve around 4-log bacterial reduction after 5 h and with minor regrowth after  
183 24 h. This efficacy is significantly higher as compared with previous reports, in which at least  
184 25% human serum is needed to achieve the same killing efficiency [15, 21, 31, 35, 36].

185 We next examined the antibiotic adjuvant effect of Dpo71. Colistin was chosen because it  
186 was the only tested antibiotics that the MDR-AB2 strain was susceptible to with a minimum  
187 inhibition concentration (MIC) of 2 µg/ml [34] (**Table S2**). The colistin concentration was set  
188 at 1 µg/ml, half of the MIC value. **Fig. 3C** shows that 1 µg/ml colistin alone or colistin with 5%  
189 serum had no antibacterial effect against the inoculation of 10<sup>8</sup> cfu/ml. Dpo71 combined with  
190 5% serum could achieve around 4-log bacterial reduction and the antibacterial effect was  
191 further enhanced to nearly complete eradication (residual viable bacteria reduced from 4.4 ±  
192 0.2 log to 0.7± 1.1 log) when Dpo71 was used in combination with 1µg/ml colistin in the  
193 presence of 5% serum (**Fig. 3C**). This boosting effect was consistent with a modified  
194 checkerboard assay examining the synergy between Dpo71 and colistin that the MIC of  
195 colistin dropped from 2 µg/ml to 0.5 µg/ml with the addition of 5% serum (Data not shown).  
196 Notably, these results indicated that Dpo71 could act as an adjuvant to boost the antibacterial  
197 activity of colistin in low serum condition.

198



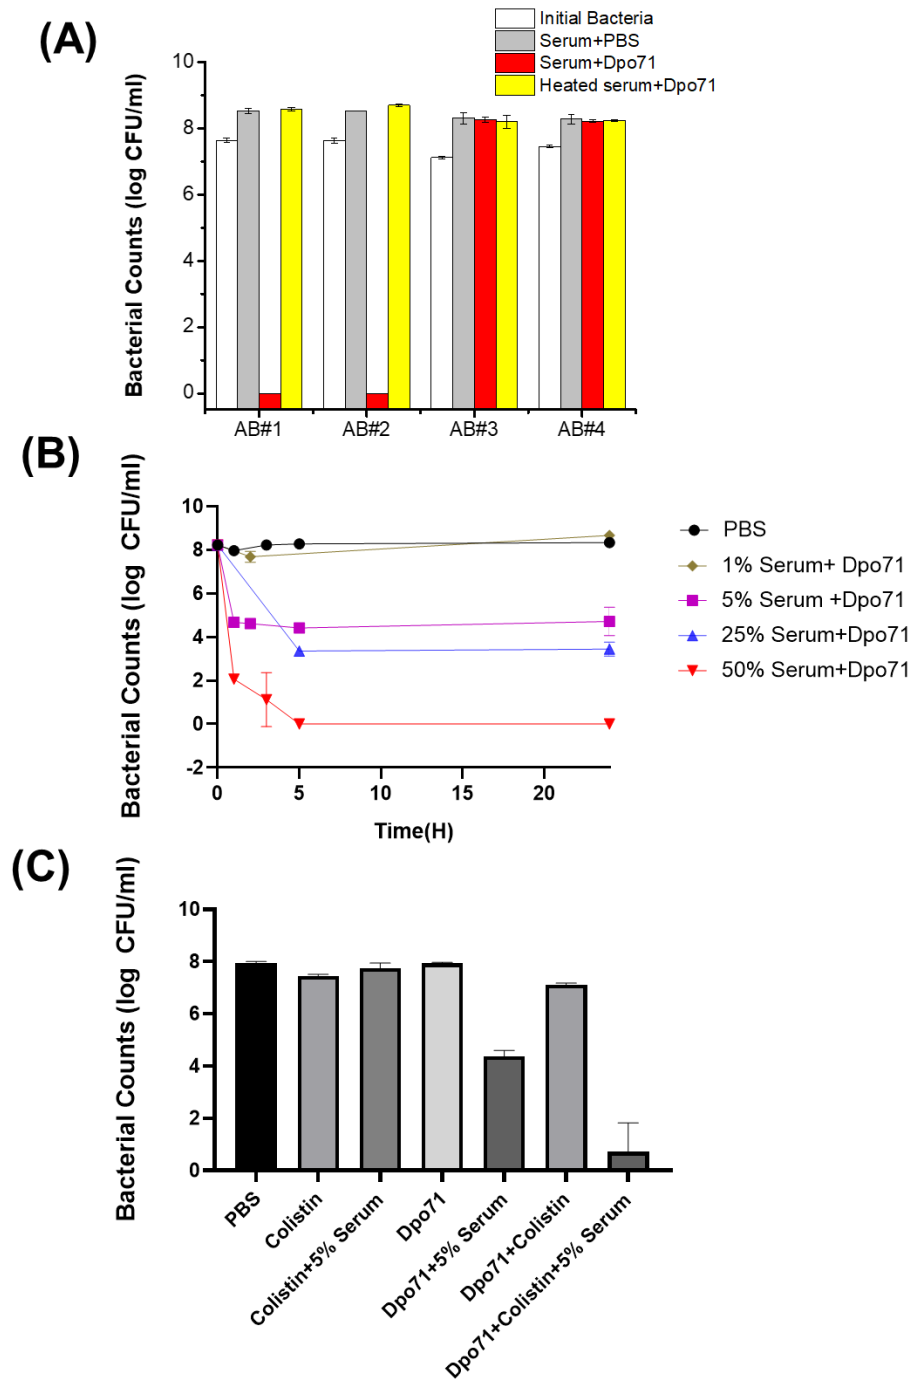

199

200

201 **FIG 3** Dpo71 enhanced the serum sensitivity and colistin activity against *A. baumannii*. (A)

202 Bacterial susceptibility to the treatment with Dpo71 concentration of 10  $\mu$ g/ml and 50%

203 serum volume ratio. *A. baumannii* clinical strains sensitive (AB#1 and AB#2) and insensitive

204 (AB#3 and AB#4) to the phage IME-AB2 were tested. (B) Time-killing curve of Dpo71 (10

205  $\mu$ g/ml) against MDR-AB2 (AB#2 strain) in the presence of 1% to 50% human serum. (C)

206 Dpo71 and colistin activity against *A. baumannii* in the presence / absence of 5% human

207 serum. Data are expressed as means  $\pm$  SD (n = 3).

## 208 **Anti-biofilm activity**

209 We next measured the inhibition effect of Dpo71 on biofilm formation. **Fig. 4A** shows  
210 Dpo71 inhibits biofilm formation in a dose-dependent manner. At 1  $\mu\text{g/ml}$  Dpo71, the  
211 residual biomass was 80% as compared with the PBS-treated control. The residual biomass  
212 was further reduced to  $60.0 \pm 7.2\%$  at 10  $\mu\text{g/ml}$  Dpo71 and  $58.2 \pm 7.0\%$  at 40  $\mu\text{g/ml}$ .  
213 Therefore, 10  $\mu\text{g/ml}$  Dpo71 was chosen for the evaluation of synergistic effects with 1  $\mu\text{g/ml}$   
214 colistin (1/2 MIC) in inhibiting biofilm formation. Colistin alone brought down the biomass  
215 to  $43.5\% \pm 4.9\%$ , and further reduced to  $28.9\% \pm 3.1\%$  when used in combination with  
216 Dpo71 (**Fig. 4B**). The biofilm was visualized by the LIVE/DEAD staining, in which live cells  
217 were stained with green fluorescence and dead cells with damaged membrane were stained  
218 red (**Fig. 4C**). Our results confirmed the capability of both Dpo71-alone and co-treatment  
219 with colistin in preventing *A. baumannii* biofilm formation.

220 We next assessed whether Dpo71 or its combination with an antibiotic can remove  
221 pre-formed biofilm. According to the CV staining assay, the biomass could be disrupted by a  
222 single treatment of Dpo71 (10  $\mu\text{g/ml}$ ) or colistin (4  $\mu\text{g/ml}$ ,  $2\times$  MIC) to around 60% residual  
223 biomass of the PBS control (**Fig. 5A**). The combined treatment could further reduce the  
224 residual biomass to  $41.5\% \pm 6.6\%$ . We reached the same conclusion when we compared the  
225 number of viable bacterial cells in the dispersed biofilms (**Fig. 5B**). In the absence of Dpo71,  
226 colistin was inefficient in killing bacteria embedded in the biofilm ( $< 0.5$  log reduction),  
227 whereas with the help of Dpo71, more than 90% of the bacterial cells in biofilm were killed  
228 (from  $7.3 \pm 0.1$  to  $6.2 \pm 0.2$  in log scale). In the LIVE/DEAD viability assay, the pre-formed  
229 biofilm network was dismantled by Dpo71 (**Fig. 5C**). These results show that Dpo71 can  
230 efficiently disrupt pre-formed biofilm.

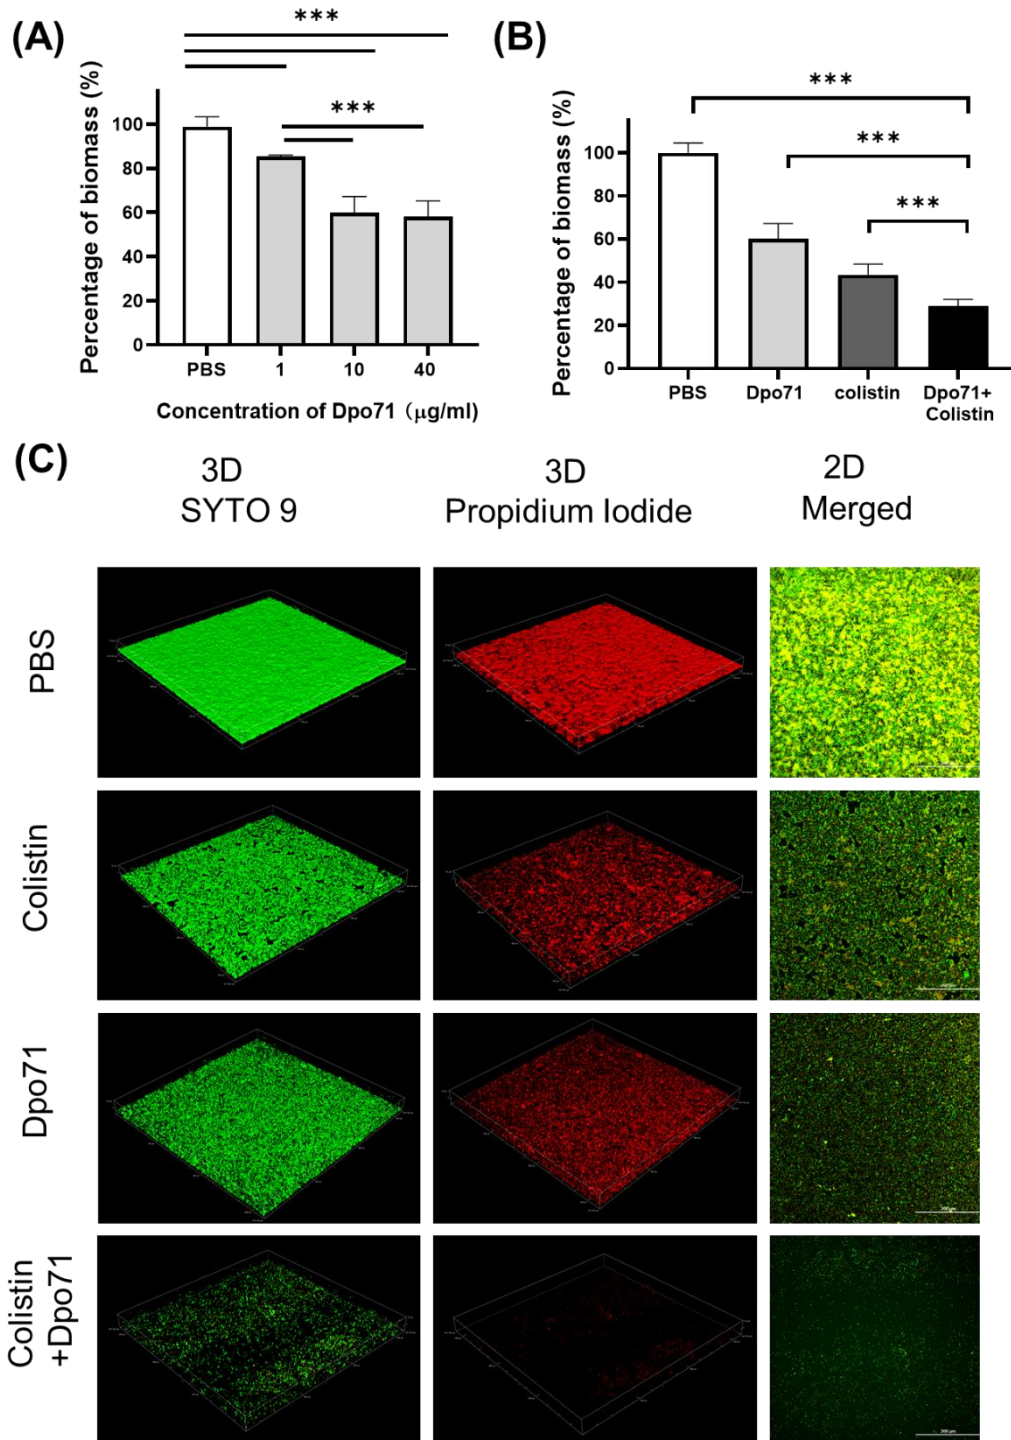

231

232 **FIG 4** Dpo71 and colistin inhibited the biofilm formation. (A) Dpo71-alone inhibited the

233 biofilm at a dose-dependent manner. (B) Dpo71 and colistin combination inhibited the

234 biofilm formation. *A. baumannii* were incubated with PBS buffer; Dpo71; colistin (1 μg /ml);

235 and their combination agents (Dpo71+colistin) in 96-well plates for 24 h, followed with

236 crystal violet staining. Data are expressed as means ± SD (n =3) with \*\*p<0.01, \*\*\*p<0.001

237 determined by Student's t-test. (C) The Representative confocal fluorescence microscopic

238 images of LIVE/DEAD stained *A. baumannii* biofilm (Scale bar, 200 μm).

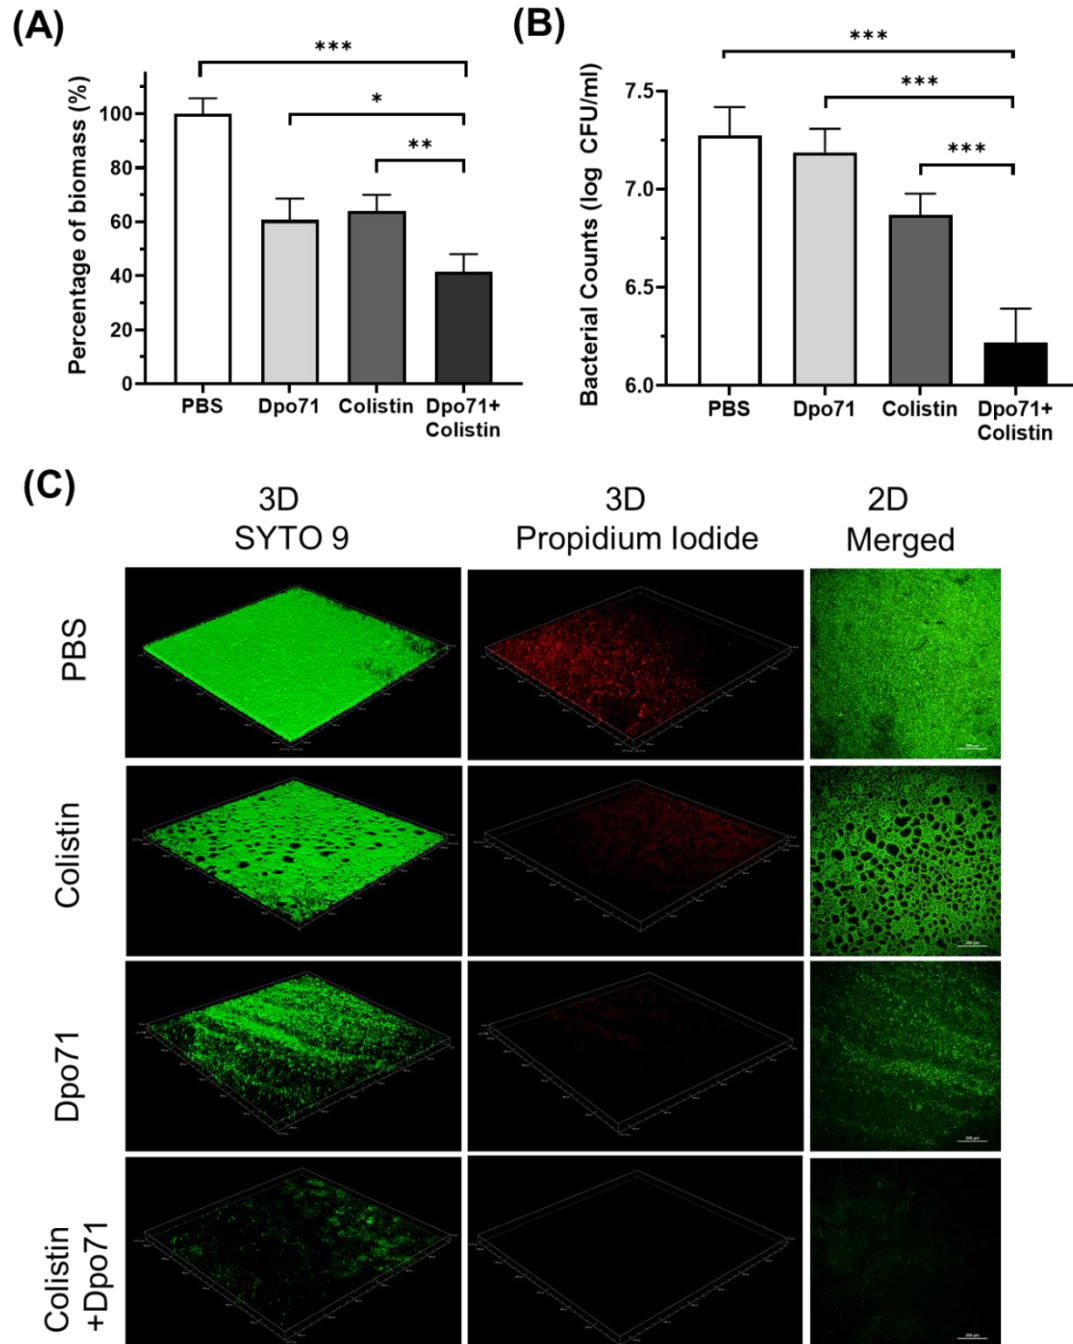

239  
240 **FIG 5** Dpo71 and colistin disrupted the pre-formed biofilm. The residual biofilm was  
241 assessed by (A) crystal violet staining and (B) *A. baumannii* bacterial counts. Briefly *A.*  
242 *baumannii* strain was grown on 96-well plates for 24 h for biofilm formation first, and then  
243 the biofilm was treated with PBS buffer, Dpo71 (10  $\mu\text{g}$  /ml), colistin (4  $\mu\text{g}$  /ml) or  
244 Dpo71+colistin for 24 h, followed with crystal violet staining and bacterial counting. Data are  
245 expressed as means  $\pm$  SD (n = 3). \* $p$ <0.05, \*\* $p$ <0.01, \*\*\* $p$ <0.001, Student's t-test. (C)  
246 Representative confocal fluorescence microscopic images of live/dead stained *A. baumannii*  
247 biofilm (Scale bar, 200  $\mu\text{m}$ ). Confocal dish was used instead of the 96-well plate here.

## 248 Antibacterial activity in a *Galleria mellonella* infection model

249 We next evaluated the *in vivo* efficacy of Dpo71 and colistin in combating bacterial  
250 infections in a *Galleria mellonella* infection model (**Fig. 6A**). In the control group,  
251 approximately 70% of the *G. mellonella* died within 18 h and the death rate increased to 90%  
252 at 48 h (**Fig. 6B**). The survival rate of the colistin-treated group increased to 50% after 24 h  
253 post-infection, and around 30% endured to the end of the monitoring period (72 h  
254 post-infection). Although depolymerase itself is not bactericidal, the Dpo71-alone treatment  
255 was found to be effective in rescuing the infected worms with 40% of the *G. mellonella*  
256 survived for 72 h. The combination treatment increased the survival rate of the infected  
257 worms to 80% till the end of the monitoring period, significantly higher than the  
258 monotherapy groups (\*\* $p < 0.01$ , log-rank test).  
259

(A)

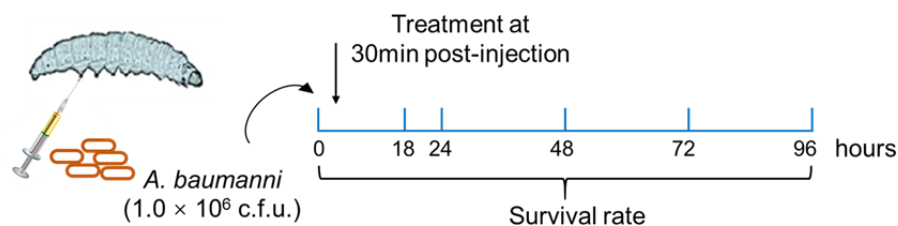

(B)

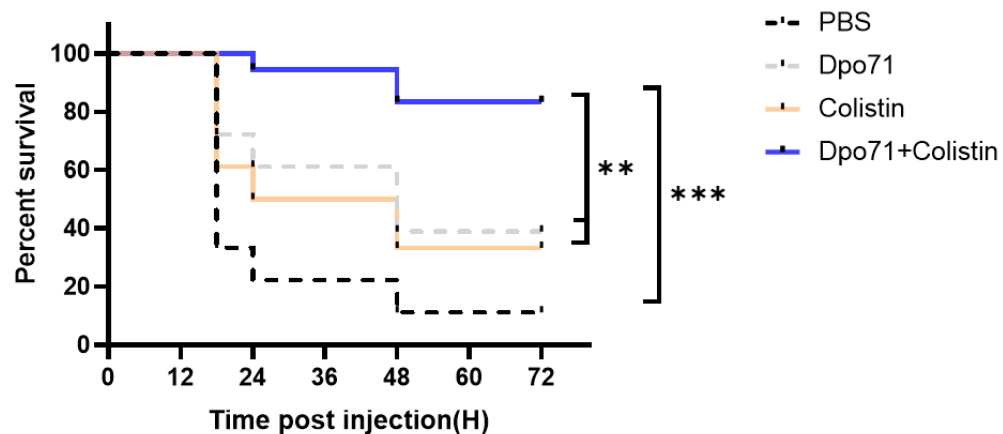

260

261 **FIG 6.** Antivirulent activity in the *Galleria mellonella* infection model. (A) Scheme of the  
262 experimental protocol for the *G. mellonella*. (B) Survival curves for *G. mellonella* infected  
263 with  $10^6$  CFU *A. baumannii* then followed by the injection of PBS buffer (control group); 5



264  $\mu\text{g}$  Dpo71; 1  $\mu\text{g}$  colistin; or 1  $\mu\text{g}$  colistin + 5 $\mu\text{g}$  Dpo71 (treatment group). (n=18, \*\*p<0.01,  
265 \*\*\* p<0.001, Kaplan-Meier survival analysis with log-rank test).

## 266 DISCUSSION

267 *A. baumannii*, one of most alarming nosocomial G-ve pathogens, has drawn significant  
268 attention in clinical settings due to its exceptional ability to acquire resistance to the  
269 commonly used antibiotics [40]. Although the knowledge on the mechanisms involved in the  
270 pathogenicity of *A. baumannii* is still limited, the production of bacterial capsular  
271 polysaccharides has been regarded as an important virulence factor, conferring its intrinsic  
272 resistance to peptide antibiotics and protecting it from host immune attack [41–43]. *A.*  
273 *baumannii* has previously shown a much higher biofilm formation rate (80~91%) compared  
274 with other species (5-24%) [44]. Its excellent capability of forming biofilms also contributes  
275 to the bacterial pathogenicity and resistance toward antibiotics. As CPS and EPS (a major  
276 component of the biofilms) are the substrates of phage encoded depolymerases, the  
277 application of recombinant depolymerases has received compelling interest as novel  
278 antivirulence agents to control multidrug-resistant infections [13,14]. A few depolymerases  
279 encoded by *A. baumannii* phage have been identified in recent years with demonstrated *in*  
280 *vivo* efficacy [28, 29, 32, 45, 46]. However, the synergistic effects of the combination of  
281 depolymerases and the SOC antibiotics in controlling infections caused by *A. baumannii* have  
282 never been attempted.

283 In this study, depolymerase Dpo71, derived from an *A. baumannii* phage, IME-AB2 was  
284 found to remain activity at a pH range of 4–8 and have a  $T_m$  of 58.5°C, suggesting it can be  
285 used under most physiological conditions. The robust nature of depolymerase was consistent  
286 with other reports [30, 35]. Importantly, it is the first report that demonstrates the excellent  
287 storage stability of a depolymerase with no noticeable activity loss for at least 6 months  
288 storing at 4 °C. This would offer great advantages in developing depolymerases as  
289 commercially viable antibacterial agents. The purified recombinant Dpo71 effectively  
290 decapsulates the host bacteria of its parent phage (AB#1 and AB#2) and re-sensitises them to  
291 serum killing in a serum ratio-dependent manner (**Fig. 3B**). The depolymerase treatment was  
292 largely limited for systemic infections because bacterial killing required the aid from the host  
293 immune attack such as complement-mediate killing. In the present study, the Dpo71 treated  
294 bacteria were significantly reduced in the presence of 5% serum ratio (4 log killing from a  
295  $10^8$  CFU/ml), representing the possibility of applying this depolymerase beyond systemic  
296 infection to environments with a low serum level, like lung infections. To the best of our

297 knowledge, this was the first report showing that complete bacterial eradication could be  
298 achieved with depolymerase and serum (at 50% volume ratio) treatment. In previous studies  
299 [15, 21, 31, 35, 36, 46], a 50% serum (complement) ratio could only kill 2–5 log of the  
300 depolymerase treated bacteria and no further killing was noted when the serum (complement)  
301 ratio increased to 75%. Liu *et al.* postulated the incomplete bacteria killing was due to the  
302 emergence of the resistant phenotypes [31]. Therefore, the refractory to resistance  
303 development towards the depolymerase treatment was assessed and compared with the parent  
304 phage treatment (**Table 1**). While the bacteria developed phage resistance after 24-h  
305 co-incubation, they remained sensitive to the Dpo71 depolymerase. The sensitivity of the  
306 bacteria incubating with Dpo71 and 5% serum was also examined. Dpo71 could still yield a  
307 clear halo spot on the treated bacteria lawn (Data not shown), suggesting they were still  
308 sensitive to the depolymerase. It is mainly because depolymerases do not directly kill the  
309 bacteria during the antibacterial treatment, reducing the impetus for bacteria to evolve  
310 mechanisms against the depolymerases.

311 Biofilm formation is one of the major contributors for the chronicity of *A. baumannii*  
312 infections and their increased antibiotic resistance [44]. As the EPS can account for 80–90%  
313 of the biofilm matrix, the ability of phage in eradicating biofilms was reported to be  
314 accounted by the action of their tailspike depolymerases degrading the EPS, facilitating their  
315 diffusion through the dispersed biofilms to get access to the underneath bacteria [47]. The  
316 effectiveness of recombinant depolymerases in preventing biofilm formation and disrupting  
317 the established biofilms has also been studied. The susceptibility of biofilms to phage  
318 depolymerase treatments varied, depending on the bacterial strains and the activity of  
319 depolymerases. In most reported antibiofilm studies, depolymerases were able to cause a 10%  
320 – 40 % biofilm reduction compared with the untreated controls in a dose-dependent manner  
321 [18–20, 25, 29]. However, there were also reports showing depolymerases were ineffective in  
322 dispersing the biofilms, though they were capable of decapsulating bacterial CPS [26].  
323 Overall, the depolymerase treatment were unable to completely inhibit or remove biofilms  
324 and the number of viable bacterial counts in the biofilms were similar to the untreated  
325 controls [18–20, 25], with a few exceptions [24, 29]. These suggested that using  
326 depolymerases as a stand-alone treatment might not be sufficient in controlling infections  
327 associated with biofilms. Impairing drug diffusion (subdiffusion) within the biofilm matrix is  
328 a major contributor to the sub-optimal treatment to biofilm related infections [48]. Improving  
329 the antibiotics penetration into the biofilm matrix may hold the key to better clinical



330 outcomes. In the present study, Dpo71 demonstrated moderate biofilm inhibition and removal  
331 capacities, both around 40% reduction compared with the PBS control, at an optimal  
332 concentration of 10 µg/ml (**Figs. 4 and 5**). In consistent with most previous studies, Dpo71  
333 could effectively disperse the biofilms but failed to reduce the viable bacterial counts in the  
334 biofilms and this was also visually reflected in the LIVE/DEAD confocal images.  
335 Combination treatment with colistin, which is the only antibiotics that the MDR-AB2 strain  
336 susceptible to, was studied. The residual biomass and the number of viable bacterial counts  
337 within the biofilms were both significantly reduced compared with the depolymerase-alone  
338 and colistin-alone treatments, confirming the positive effect of depolymerase-antibiotic  
339 combination treatment noted in other bacterial species [23–25]. Previously, Dunsing *et al.* [47]  
340 have proved that treating established *Pantoea stewartii* biofilms with phage tailspike proteins  
341 could rapidly restore unhindered diffusion of nanoparticles. Therefore, the improved  
342 antibiofilm ability with the combined Dpo71 and colistin treatment noted here was likely  
343 attributed to the improved colistin penetration within the biofilm matrix after the EPS  
344 depolymerization by the Dpo71. Overall, our data support the depolymerase and antibiotic  
345 combination as a promising alternative treatment strategies in managing biofilm associated  
346 infections caused by *A. baumannii*.

347 The *G. mellonella* infection model was first developed to study the bacterial pathogenicity by  
348 Peleg *et al.* [49] and has emerged as a valuable inset model to evaluate the effectiveness of  
349 novel antibacterial reagents [50, 51]. Several reasons make it a popular model: the larvae (1)  
350 can survive at 37 °C to mimic the physiological condition of human; (2) have fast  
351 reproduction time to allow high-throughput of experiments compared with mammalian  
352 systems; (3) have a semi-complex cellular and humoral innate immunity, which shares  
353 remarkable similarities with mammals, but no adaptive immune response to interfere with the  
354 therapeutic outcome [52]. Importantly, the *G. mellonella* model does not require ethical  
355 approval to provide informed data in reducing the number of mammals used for further  
356 identification/confirmation of the potential lead compounds. Liu *et al.* first evaluated the *in*  
357 *vivo* efficacy of Dpo48 identified from an *A. baumannii* phage (IME200) using a *G.*  
358 *mellonella* infection model [45]. They showed that the Dpo48 treated *G. mellonella* had a  
359 higher survival rate (10–30%) than the untreated group at all the time points throughout the  
360 study period (72 h). Although the Dpo48 treatment outcome was not particularly profound in  
361 the *G. mellonella* infection model, they showed that the Dpo48 could significantly reduce the  
362 bacterial load 6 h post-treatment and rescue 100% of the infected mice (both normal and

363 immunocompromised) from fatal sepsis. They attributed the difference in the insect and  
364 mammal infection models to the simpler innate immune response of insects. Nonetheless,  
365 their results confirmed that the *G. mellonella* infection model is sufficient to predict the  
366 antivirulent capacity of depolymerase and their ability to control *A. baumannii* infections in  
367 mammals. As shown in **Fig. 6B**, the survival rate of infected *G. mellonella* treated by Dpo71  
368 or colistin monotherapy were around 40%, but the survival rate of those treated by the  
369 combination of Dpo71 and colistin could be significantly enhanced to 80%. The results  
370 confirmed that Dpo71 was effective in reducing the virulence level of MDR-AB2 *in vivo* and  
371 prolonged the survival time of the infected worms as demonstrated in Liu *et al.* [45].  
372 Moreover, the adjuvant effect of depolymerase to colistin was demonstrated *in vivo*, in  
373 consistent with the *in vitro* biofilm experiments. These results warrant further studies on  
374 assessing the potential of the combination in treating biofilm-associated infections in  
375 mammals.

376 While promising effects on the use of depolymerase as antivirulence agents have been  
377 demonstrated *in vivo*, knowledge on the exact mechanisms of *A. baumannii* CPS cleavage by  
378 phage depolymerases are still largely missing [53]. In addition, depolymerases also present  
379 high specificity toward a narrow range of target polysaccharides (specific capsular type of the  
380 bacteria). In some cases, depolymerases might only be active against a subset of bacteria of  
381 their parent phage which are already specific to a small set of bacteria strains [18, 29, 36].  
382 Such narrow host spectrum would greatly limit the wider therapeutic application of  
383 depolymerases. Further work on elucidating mechanisms of action of depolymerases would  
384 allow protein engineering to extend their host range and activity, facilitating their application  
385 as stand-alone treatment or as adjuvant with SOC antibiotics.

386

## 387 **CONCLUSION**

388 In summary, phage tailspike proteins with depolymerase activity are promising antivirulence  
389 agents to re-sensitize *A. baumannii*, even the drug-resistant strains, to host immune attack.  
390 The identified Dpo71 depolymerase was found to effectively degrade bacterial capsules with  
391 excellent stability at various pH and upon storage. The refractory to resistance development  
392 toward depolymerase treatment have also made it attractive alternative weapon to control *A.*  
393 *baumannii* infections. In addition, Dpo71 alone can be utilized to prevent and remove *A.*  
394 *baumannii* biofilms. The combination of Dpo71 and colistin was further demonstrated  
395 significantly enhanced antibiofilm activity compared with the monotherapies. Furthermore,

396 this depolymerase was able to enhance the colistin antibacterial activity *in vivo*, markedly  
397 improving the survival rate of infected *G. mellonella*. As carbapenem-resistant *A. baumannii*  
398 has been ranked as the number one priority pathogen by the WHO and there are no antibiotics  
399 which have reached the advanced stage in the development pipeline to target this superbug,  
400 depolymerases as a stand-alone treatment or adjuvant to antibiotics may represent promising  
401 treatment strategies in controlling multidrug-resistant *A. baumannii* infections.

## 402 **MATERIALS AND METHODS**

### 403 **Bacterial strains and culture condition**

404 All bacterial strains used in this study are listed in **Table S1**. A multidrug-resistant strain of *A.*  
405 *baumannii*, MDR-AB2, isolated from the sputum samples of a patient with pneumonia at  
406 PLA Hospital 307 was supplied by the Beijing Institute of Microbiology and Epidemiology  
407 [34]. All the bacterial strains were grown in Nutrient Broth (NB) medium at 37 °C.

### 408 **Plasmid construction**

409 The plasmid was constructed using standard cloning methods. Genes encoded Dpo71  
410 (Protein id: YP\_009592222.1) was synthesized by BGI (Shenzhen, China) and cloned into  
411 the pET28a plasmid using BamHI and XhoI site and the protein sequence was listed in  
412 supporting information (**Table S3**)

### 413 **Recombinant proteins expression and purification**

414 **Protein expression.** The constructed plasmid was transformed into *E. coli* BL21 (DE3) cells  
415 and colonies were grown overnight at 37 °C in LB media supplemented with 50 µg/mL  
416 kanamycin. The start culture was grown overnight, and then was used to inoculate LB media  
417 supplemented with antibiotics at 1:100 ratio. The cell culture was grown at 37 °C to reach  
418 OD<sub>600</sub> ~0.6 before 0.25 mM IPTG was added to induce protein expression. After grown at 16  
419 °C overnight, cells were harvested for protein purification.

420 **Purification of depolymerase.** The enzyme was purified by nickel affinity chromatography  
421 using HisTrap™ HP column (GE Healthcare). Briefly, harvested cells were re-suspended in  
422 lysis buffer containing 10 mM imidazole, 50 mM phosphate/300 mM sodium chloride (pH  
423 8.0). The cell suspension was lysed by sonication and centrifuged. The supernatant was  
424 collected, filtered, and loaded into the column. The bound protein was eluted by imidazole  
425 gradient from 10 mM to 500 mM. Pure protein fractions eluted with imidazole gradient were  
426 collected and exchanged with PBS (pH 7.4). After purification, all proteins were flash frozen  
427 under liquid nitrogen and stored at -80 °C. Protein concentration was estimated using a Nano

428 Drop (Thermo fisher, USA) using the extinction coefficient and molecular mass of  
429 corresponding lysins. Finally, the purity of the protein was analyzed by 12% SDS-PAGE.

### 430 **Circular dichroism (CD) spectroscopy**

431 Far-UV CD spectroscopy is commonly used to analyse the secondary structures of proteins  
432 with a Jasco J810 CD spectrometer [35]. The spectrum measurement was performed with the  
433 Dpo71 of 0.30 mg/mL in PBS buffer (pH 7.4) using a wavelength range from 190 to 260 nm.  
434 Thermal denaturation with 1°C/min increments was also employed to measure the secondary  
435 structure unfolding at 215 nm, from 20 to 90°C. The melting curves were fitted into a  
436 Boltzmann sigmoidal function.

### 437 **Spot test assay**

438 The depolymerase activity of Dpo71 was qualitatively assayed by a modified single-spot  
439 assay. In brief, 100 µL of MDR-AB2 overnight bacterial culture was added to 5 mL of  
440 molten soft nutrient agar (0.7%) and incubated at 37 °C for 3 h to form a bacterial lawn in  
441 plates. The purified enzyme was serially diluted, then 5 µL of each dilution (from 0.001 µg to  
442 10 µg) was dropped onto an MDR-AB2 bacterial lawn for incubation at 37 °C overnight. The  
443 plates were monitored for the formation of semi-clear spots as a confirmation of the  
444 depolymerase activity.

### 445 **Extraction of bacterial surface polysaccharides**

446 The extraction and purification of bacterial EPS was performed via a modified hot  
447 water-phenol method as described previously [36, 37]. Briefly, *A. baumannii* were cultured  
448 overnight in LB with 0.25% glucose. 1 mL culture was centrifuged (10000 rpm, 5 min) and  
449 resuspended in 200 µL of double distilled water (ddH<sub>2</sub>O). An equal volume of  
450 water-saturated phenol (pH 6.6; Thermo Fisher Scientific) was added to the bacterial  
451 suspension. The mixture was vortexed and incubated at 65 °C for 20 min, centrifuged at  
452 10000 rpm for 10 min. Then the supernatant was extracted with chloroform to remove  
453 bacterial debris. The obtained EPS was lyophilized and stored at -20 °C.

### 454 **Quantification of depolymerase activity and alcian blue staining**

455 The enzymatic activity of Dpo71 on bacterial surface polysaccharides was determined as  
456 described in Majkowska-Skrobek *et al.* [37] with minor modifications. The EPS powder of *A.*  
457 *baumannii* was resuspended in ddH<sub>2</sub>O (1 mg/mL), and mixed with Dpo71 (30 µg/mL) or  
458 deactivated Dpo71 (by heating at 90 °C for 15 min) to a final reaction volume of 200 µL. EPS

459 or enzyme alone served as the controls. After 2 h incubation at 37 °C, cetylpyridinium  
460 chloride (CPC, Sigma-Aldrich) was added to the mixture at the final concentration of 5  
461 mg/mL, which was further incubated at room temperature for 5 min. Absorbance was  
462 measured at 600 nm using a microplate reader (Multiskan Sky, Thermo Fisher). The  
463 experiment was performed in triplicate and repeated at least in two independent experiments.

464 The CPS detected by Alcian blue staining was performed as previously described [36, 37].  
465 The treated samples were separated by a 10% SDS-PAGE. The gel was then washed with the  
466 fix/wash solution (25% ethanol, 10% acetic acid in water) and stained by 0.1% Alcian blue  
467 (Sigma-Aldrich) dissolved in the fix/wash solution for 15 min in the dark. CPS was  
468 visualized blue after the gel was destained overnight in the fix/wash solution.

#### 469 **Influence of pH and storage time on the depolymerase activity**

470 The EPS powder was dissolved in 100 mM citric acid- $\text{Na}_2\text{HPO}_4$  buffer (pH 3.0–8.0) or 100  
471 mM Glycine-NaOH buffer (pH 9.0–10.0) to a final concentration of 1 mg/mL. The EPS  
472 solutions of *A. baumannii* were mixed with Dpo71 (30  $\mu\text{g}/\text{mL}$ ) to a final reaction volume of  
473 200  $\mu\text{l}$ , respectively. After 2 h incubation at 37 °C, the turbidity of residual EPS in various  
474 pH buffers was determined as described above. The effect of pH on the enzymatic activity  
475 was determined by this method. The storage stability of Dpo71 at 4 °C was determined by  
476 measuring the EPS degradation activity after 1, 3 and 6 months storage. All assays were  
477 performed in triplicate and repeated at least in two independent experiments.

#### 478 **Serum killing assay**

479 The serum killing assay was performed as previously described [35]. Logarithmic phase  
480 bacteria were prepared by inoculating overnight culture at 1:100 ratio in NB medium and  
481 shaking 180 rpm for 3-4 hours at 37 °C. Then the cells of each culture (AB#1, AB#2, AB#3  
482 and AB#4) were harvested via centrifugation, washed, and resuspended in PBS, then adjusted  
483 to  $\text{OD}_{600} = 0.6$ . Human serum (Sigma, Shanghai, China) was mixed with (i) only bacteria or  
484 (ii) bacteria and Dpo71 mixture. The Dpo71 was fixed at final concentration of 10  $\mu\text{g}/\text{ml}$  and  
485 volume ratio of human serum was at 50%. Experiments with heat-inactivated serum (at 56°C  
486 for 30 min) were served as controls. The mixtures were then incubated at 37 °C for 4 h for  
487 viable bacterial counting. Time-killing assays were also performed for the two sensitive strain  
488 (AB#1, AB#2) with the volume ratio of human serum varied from 1% to 50% and at 100  
489  $\mu\text{g}/\text{ml}$  Dpo71. Samples were withdrawn at 1, 3, 5 and 24 h for bacterial counting. The All  
490 assays were performed in triplicate and repeated at least in two independent experiments.

#### 491 **Biofilm inhibition assay**

492 *A. baumannii* strains were grown in NB medium overnight at 37 °C with continuous shaking  
493 180 rpm. The overnight bacterial culture was diluted with fresh NB medium to a final density  
494 of 10<sup>6</sup> CFU/ml. Then the diluted bacteria cultures were treated with PBS (control), Dpo71 (1  
495 µg/mL, 10 µg/mL or 40 µg/mL), colistin (1 µg /mL) or their combination (Dpo71+ colistin)  
496 with a final volume of 150 µL / well at 37 °C for 24 h with gentle shaking (100 rpm). At the  
497 end of the incubation time, all medium were removed and the wells were stained with 200 µL  
498 0.1% (w/v) crystal violet for 1 h. After staining, the crystal violet solution were removed and  
499 the wells were washed with 200 µL PBS for three times. Then, 200 µL of 70% ethanol was  
500 added to dissolve the crystal violet and 100 µL solution was transferred to a new plate for  
501 quantification of the residual biofilm biomass using a microplate reader (CLARIOstar, BMI  
502 Labtech, Germany) at 570 nm. All experiments were performed in three biological replicates  
503 and repeated at least in two independent times.

#### 504 **Biofilm removal assay**

505 *A. baumannii* strains were grown in NB medium overnight at 37 °C with continuous shaking  
506 100 rpm. The overnight bacterial culture was diluted with fresh NB medium to a final density  
507 of OD<sub>600</sub> = 0.2. To initiate the biofilm growth, diluted culture was aliquoted into a 96-well  
508 plate at 100 µL/well (Costar, Corning Incorporated, U. S. A.) and incubated at 37 °C for 24 h  
509 at 100 rpm. Biofilm was washed twice with PBS and treated with PBS (control), Dpo71 (10  
510 µg /ml), colistin (4 µg /ml) or their combination (Dpo71+colistin) with a final volume of 150  
511 µL / well at 37 °C for 24 h with gentle shaking (100 rpm). At the end of the incubation time,  
512 the residual biomass was quantified using crystal violet as described in the inhibition assay  
513 above. The antibiofilm activity was also evaluated by the counting the viable bacteria in the  
514 biofilm [54]. Briefly, the biofilm was grown and treated as above, then the wells were  
515 washed three times with PBS. Then the biofilm-containing wells were mixed fully with a  
516 pipetting device, making the biofilm cells become planktonic cells. Each sample was serially  
517 diluted and plated to for bacterial counting. All experiments were performed in triplicate and  
518 repeated at least in two independent times.

#### 519 **Confocal laser scanning microscopy on biofilm removal**

520 Confocal dish (NEST brand, China) was used instead of the 96-well plate for the antibiofilm  
521 study described above. Before microimaging, the biofilms were stained by LIVE/DEAD™  
522 BacLight™ Bacterial Viability Kit (Thermo Fisher) for 60 mins following the manufacturer's



523 instructions. Then the biofilms were washed three times with PBS before the confocal laser  
524 scanning microscopy (Nikon, C2+ confocal, Japan) study. The excitation maximum and  
525 emission maximum of SYTO 9 is at 483 nm and 503 nm, respectively. The excitation  
526 maximum and emission maximum of propidium iodide is at 493 nm and 636 nm,  
527 respectively.

528

### 529 **Hemolysis assay**

530 The effect of Dpo71 on the hemolysis of human red blood cells was performed using  
531 previously described methods with minor modifications [30, 31]. The human blood sample  
532 from a healthy donor was centrifuged at 1000 rpm for 10 min to remove the serum. The red  
533 blood cell pellets were washed with PBS (pH = 7.4) at least three times and then diluted to a  
534 concentration of 5% (volume ratio) with PBS. The Dpo71 (10 µg/ml, 100 µg/ml and  
535 500 µg/ml, final concentration) was added to the red blood cells and incubated at 37°C for 1 h,  
536 followed by centrifugation at 1000 rpm for 10 min. Then 100 µL supernatant was transferred  
537 to a 96-well microplate and topped up with another 100 µL of PBS to get a final volume of  
538 200 µL. The erythrocytes in PBS and 0.1% Triton X-100 were served as negative and  
539 positive controls, respectively. The hemoglobin in supernatant was determined by measuring  
540 absorbance at 540 nm using a microplate reader (Multiskan Sky, Thermo Fisher). All  
541 experiments were performed in three biological replicates and repeated at least in two  
542 independent times.

### 543 **Cytotoxicity of Dpo71 against BEAS-2B cell**

544 BEAS-2B (Human Normal Lung Epithelial Cells) cells were cultured in DMEM (Gibco)  
545 containing 10% FBS (Gibco) under standard conditions in a humidified incubator with 5%  
546 CO<sub>2</sub> at 37 °C. The cytotoxic effect of the Dpo71 on BEAS-2B cells was measured by Cell  
547 Counting Kit-8. The BEAS-2B cells were seeded at density of 10<sup>4</sup> cells/well in a 96-well  
548 plate containing 200 µL of culture medium and incubated at 37 °C for 24 h. Next, the cells  
549 were incubated with Dpo71 for 12 h followed by incubating with 10 µL of WST-8 solution  
550 (Beyotime, Shanghai, China) for another 2 h at 37 °C. Absorbance was measured at a  
551 wavelength of 450 nm using a microplate reader (Multiskan Sky, Thermo Fisher). The PBS  
552 group was served as a negative control. All experiments were performed in three biological  
553 replicates and repeated at least in two independent times.

### 554 **Bacterial resistance assay**



555 The development of phage-resistant and depolymerase-resistant bacterial variants was  
556 conducted as previously described [30] with minor modifications. Briefly, IME-AB2 phage  
557 (MOI of 10) or Dpo71 (100 µg/ml, final concentration) was incubated with  $\sim 10^6$  CFU/ml of  
558 *A. baumannii* (MDR-AB2) in NB medium for 16 h (37 °C, 120 rpm). The cultures were  
559 plated to obtain isolated bacterial colonies. These were subcultured three times in agar plates  
560 to guarantee that the colonies were free of phage and Dpo71. Then 10 random colonies were  
561 picked to test the sensitivity toward both phage and Dpo71 using the spot test. Bacteria  
562 incubated with PBS was served as a control. Challenged bacteria were considered resistant to  
563 phage or Dpo71 when no plaque/inhibition halo was observed.

#### 564 ***Galleria mellonella* infection model**

565 The *G. mellonella* model was conducted following the procedures described by Peleg *et al.*  
566 with some minor modifications [49], and referring in other *G. mellonella* studies [50,51]. The  
567 *G. mellonella* larvae were acquired from WAGA company in Hong Kong and the injection  
568 was performed with a 10 µl SGE syringe (Sigma–Aldrich, Shanghai, China). To infect the *G.*  
569 *mellonella*, the larvae were first injected with  $10^6$  CFU *A. baumannii* (MDR-AB2 strain) into  
570 the last left proleg. Then the PBS buffer (control group) or 5 µg Dpo71; 1 µg colistin; or 1 µg  
571 colistin + 5µg Dpo71 (treatment group), were injected into the last right proleg within 30 min.  
572 The *G. mellonella* were then incubated at 37°C and observed at 24 h intervals over 4 days.  
573 The *G. mellonella* which did not respond to physical stimuli were considered dead. Each  
574 group included 9 *G. mellonella* with individual experiments repeated two times (n = 18).

#### 575 **Statistics**

576 All experimental data are presented as means  $\pm$  standard deviation (SD), and significance was  
577 determined using independent Student's t tests and the one-way analysis of variance  
578 (ANOVA), assuming equal variance at a significance level of 0.05. Comparison of the  
579 survival rates of *G. mellonella* between groups was determined by Kaplan-Meier survival  
580 analysis with a log-rank test. All statistical analysis was performed using GraphPad Prism  
581 software.

582

583

584 **Data Availability Statement**

585 All data for the paper are contained in the main text or SI Appendix.

586 **ACKNOWLEDGMENTS**

587 The authors are thankful to Prof. Changqing Bai from the Fifth Medical Centre of Chinese  
588 PLA General Hospital, Beijing, China and Dr. Lin Zhang from Prince of Wales Hospital,  
589 Hong Kong for their kind donation of bacterial strains tested in the present study. This work  
590 was partially funded by the University Grants Committee of Hong Kong (ref.  
591 N\_CUHK422/18 and ref. 24300619).

592

593

## 594 REFERENCES

- 595 1. Centers for Disease Control and Prevention. 2019. Antibiotic resistance threats in the  
596 United States.
- 597 2. WHO. 2017. Global priority list of antibiotic-resistant bacteria to guide research,  
598 discovery, and development of new antibiotics.
- 599 3. Peleg AY, Seifert H, Paterson DL. 2008. *Acinetobacter baumannii*: emergence of a  
600 successful pathogen. *Clin Microbiol Rev* 21:538-582.
- 601 4. Fair RJ, Tor Y. 2014. Antibiotics and bacterial resistance in the 21st century. *Perspect*  
602 *Medicin Chem* 6:25-64.
- 603 5. Pendleton JN, Gorman SP, Gilmore BF. 2013. Clinical relevance of the ESKAPE  
604 pathogens. *Expert Rev Anti Infect Ther* 11:297-308.
- 605 6. World-Health-Organization. 2019 Antibacterial agents in clinical development: an  
606 analysis of the antibacterial clinical development pipeline.  
607 <https://apps.who.int/iris/bitstream/handle/10665/330420/9789240000193-eng.pdf>
- 608 7. Hampton HG, Watson BNJ, Fineran PC. 2020. The arms race between bacteria and their  
609 phage foes. *Nature* 577(7790):327-336.
- 610 8. Verbeken G, Huys I, Pirnay JP, Jennes S, Chanishvili N, Scheres J, Górski A, De Vos D,  
611 Ceulemans C. 2014. Taking bacteriophage therapy seriously: a moral argument. *Biomed*  
612 *Res Int* 621316.
- 613 9. Verbeken G, Pirnay JP, Lavigne R, Jennes S, De Vos D, Casteels M, Huys I. 2014. Call  
614 for a dedicated European legal framework for bacteriophage therapy. *Arch Immunol Ther*  
615 *Exp (Warsz)*. 62(2):117-29.
- 616 10. Verbeken G, Huys I, De Vos D, De Coninck A, Roseeuw D, Kets E, Vanderkelen A,  
617 Draye JP, Rose T, Jennes S, Ceulemans C, Pirnay JP. 2016. Access to bacteriophage  
618 therapy: discouraging experiences from the human cell and tissue legal framework.  
619 *FEMS Microbiol Lett* 363(4):fnv241.
- 620 11. Latka A, Maciejewska B, Majkowska-Skrobek G, Briers Y, Drulis-Kawa Z. 2017.  
621 Bacteriophage-encoded virion-associated enzymes to overcome the carbohydrate barriers  
622 during the infection process. *Appl Microbiol Biotechnol* 101(8):3103-3119.
- 623 12. Lai WCB, Chen X, Ho MKY, Xia J, Leung SSY. 2020. Bacteriophage-derived  
624 endolysins to target gram-negative bacteria. *Int J Pharm* 589:119833.
- 625 13. Knecht LE, Veljkovic M, Fieseler L. 2020. Diversity and function of phage encoded  
626 depolymerases. *Front Microbiol* 10:2949.
- 627 14. Pires DP, Oliveira H, Melo LD, Sillankorva S, Azeredo J. 2016. Bacteriophage-encoded  
628 depolymerases: their diversity and biotechnological applications. *Appl Microbiol*  
629 *Biotechnol* 100(5):2141-51.
- 630 15. Majkowska-Skrobek G, Latka A, Berisio R, Squeglia F, Maciejewska B, Briers Y,  
631 Drulis-Kawa Z. 2018. Phage-borne depolymerases decrease *Klebsiella pneumoniae*  
632 resistance to innate defense mechanisms. *Front Microbiol* 9:2517.
- 633 16. Lin TL, Hsieh PF, Huang YT, Lee WC, Tsai YT, Su PA, Pan YJ, Hsu CR, Wu MC,  
634 Wang JT. 2014. Isolation of a bacteriophage and its depolymerase specific for K1 capsule

- 635 of *Klebsiella pneumoniae*: implication in typing and treatment. *J Infect Dis*  
636 210(11):1734-44.
- 637 17. Chen Y, Li X, Wang S, Guan L, Li X, Hu D, Gao D, Song J, Chen H, Qian P. 2020. A  
638 novel tail-associated O91-specific polysaccharide depolymerase from a Podophage  
639 reveals lytic efficacy of Shiga toxin-producing *Escherichia coli*. *Appl Environ Microbiol*  
640 86(9):e00145-20.
- 641 18. Topka-Bielecka G, Dydecka A, Necel A, Bloch S, Nejman-Faleńczyk B, Węgrzyn G,  
642 Węgrzyn A. 2021. Bacteriophage-derived depolymerases against bacterial biofilm.  
643 *Antibiotics (Basel)* 10(2):175.
- 644 19. Gutiérrez D, Briers Y, Rodríguez-Rubio L, Martínez B, Rodríguez A, Lavigne R, García  
645 P. 2015. Role of the pre-neck appendage protein (Dpo7) from phage vB\_SepiS-phiIPLA7  
646 as an anti-biofilm agent in *Staphylococcal* species. *Front Microbiol* 6:1315.
- 647 20. Hernandez-Morales AC, Lessor LL, Wood TL, Migl D, Mijalis EM, Cahill J, Russell WK,  
648 Young RF, Gill JJ. 2018. Genomic and biochemical characterization of *Acinetobacter*  
649 Podophage Petty reveals a novel lysis mechanism and tail-associated depolymerase  
650 activity. *J Virol* 92(6):e01064-17.
- 651 21. Mi L, Liu Y, Wang C, He T, Gao S, Xing S, Huang Y, Fan H, Zhang X, Yu W, Mi Z,  
652 Tong Y, Bai C, Han F. 2019. Identification of a lytic *Pseudomonas aeruginosa* phage  
653 depolymerase and its anti-biofilm effect and bactericidal contribution to serum. *Virus*  
654 *Gene* 55(3):394-405.
- 655 22. Hughes KA, Sutherland IW, Jones MV. 1998. Biofilm susceptibility to bacteriophage  
656 attack: the role of phage-borne polysaccharide depolymerase. *Microbiology*  
657 144:3039-3047.
- 658 23. Bansal S, Harjai K, Chhibber S. 2014. Depolymerase improves gentamicin efficacy  
659 during *Klebsiella pneumoniae* induced murine infection. *BMC Infect Dis* 14:456.
- 660 24. Bansal S, Harjai K, Chhibber S. 2015. *Aeromonas punctata* derived depolymerase  
661 improves susceptibility of *Klebsiella pneumoniae* biofilm to gentamicin. *BMC Microbiol*  
662 15:119.
- 663 25. Wu Y, Wang R, Xu M, Liu Y, Zhu X, Qiu J, Liu Q, He P, Li Q. 2019. A Novel  
664 Polysaccharide Depolymerase encoded by the phage SH-KP152226 confers specific  
665 activity against multidrug-resistant *Klebsiella pneumoniae* via biofilm degradation. *Front*  
666 *Microbiol* 10:2768.
- 667 26. Latka, A.; Drulis-Kawa, Z. 2020. Advantages and limitations of microtiter biofilm assays  
668 in the model of antibiofilm activity of *Klebsiella* phage KP34 and its depolymerase. *Sci*  
669 *Rep* 10:20338.
- 670 27. Olsen NMC, Thiran E, Hasler T, Vanzielegem T, Belibasakis GN, Mahillon J, Loessner  
671 MJ, Schmelcher M. 2018. Synergistic removal of static and dynamic *Staphylococcus*  
672 *aureus* biofilms by combined treatment with a bacteriophage endolysin and a  
673 polysaccharide depolymerase. *Viruses* 10(8):438.
- 674 28. Wang C, Li P, Zhu Y, Huang Y, Gao M, Yuan X, Niu W, Liu H, Fan H, Qin Y, Tong Y,  
675 Mi Z, Bai C. 2020. Identification of a novel *Acinetobacter baumannii* phage-derived  
676 depolymerase and its therapeutic application in mice. *Front Microbiol* 11:1407.

- 677 29. Shahed-Al-Mahmud M, Roy R, Sugiokto FG, Islam MN, Lin MD, Lin LC, Lin NT. 2021.  
678 Phage  $\phi$ AB6-Borne depolymerase combats *Acinetobacter baumannii* biofilm formation  
679 and infection. *Antibiotics (Basel)*10(3):279.
- 680 30. Oliveira H, Costa AR, Ferreira A, Konstantinides N, Santos SB, Boon M, Noben JP,  
681 Lavigne R, Azeredo J. 2019. Functional Analysis and antivirulence properties of a new  
682 depolymerase from a myovirus that infects *Acinetobacter baumannii* capsule K45. *J Virol*  
683 93(4):e01163-18.
- 684 31. Liu Y, Mi Z, Mi L, Huang Y, Li P, Liu H, Yuan X, Niu W, Jiang N, Bai C, Gao Z. 2019.  
685 Identification and characterization of capsule depolymerase Dpo48 from *Acinetobacter*  
686 *baumannii* phage IME200. *PeerJ* 7:e6173
- 687 32. Oliveira H, Mendes A, Fraga AG, Ferreira A, Pimenta AI, Mil-Homens D, Fialho AM,  
688 Pedrosa J, Azeredo J. 2019. K2 capsule depolymerase is highly stable, is refractory to  
689 resistance, and protects larvae and mice from *Acinetobacter baumannii* sepsis. *Appl*  
690 *Environ Microbiol* 85(17):e00934-19.
- 691 33. Liu Y, Mi Z, Niu W, An X, Yuan X, Liu H, Wang Y, Feng Y, Huang Y, Zhang X, Zhang  
692 Z, Fan H, Peng F, Li P, Tong Y, Bai C. 2016. Potential of a lytic bacteriophage to disrupt  
693 *Acinetobacter baumannii* biofilms in vitro. *Future Microbiol* 11:1383-1393.
- 694 34. Peng F, Mi Z, Huang Y, Yuan X, Niu W, Wang Y, Hua Y, Fan H, Bai C, Tong Y. 2014.  
695 Characterization, sequencing and comparative genomic analysis of vB\_AbaM-IME-AB2,  
696 a novel lytic bacteriophage that infects multidrug-resistant *Acinetobacter baumannii*  
697 clinical isolates. *BMC Microbiol* 14:181.
- 698 35. Oliveira H, Pinto G, Mendes B, Dias O, Hendrix H, Akturk E, Noben JP, Gawor J,  
699 Łobocka M, Lavigne R, Azeredo J. 2020. A tailspike with exopolysaccharide  
700 depolymerase activity from a new providencia stuartii phage makes multidrug-resistant  
701 bacteria susceptible to serum-mediated killing. *Appl Environ Microbiol*  
702 86(13):e00073-20.
- 703 36. Liu Y, Leung SSY, Huang Y, Guo Y, Jiang N, Li P, Chen J, Wang R, Bai C, Mi Z, Gao Z.  
704 2020. Identification of two depolymerases from phage IME205 and their antivirulent  
705 functions on K47 capsule of *Klebsiella pneumoniae*. *Front Microbiol* 11:218.
- 706 37. Majkowska-Skrobek G, Łątka A, Berisio R, Maciejewska B, Squeglia F, Romano M,  
707 Lavigne R, Struve C, Drulis-Kawa Z. 2016. Capsule-targeting depolymerase, derived  
708 from *Klebsiella* KP36 phage, as a tool for the development of anti-virulent strategy.  
709 *Viruses* 8(12):324.
- 710 38. Yoshida K, Matsumoto T, Tateda K, Uchida K, Tsujimoto S, Yamaguchi K. 2000. Role  
711 of bacterial capsule in local and systemic inflammatory responses of mice during  
712 pulmonary infection with *Klebsiella pneumoniae*. *J Med Microbiol* 49(11):1003-1010.
- 713 39. Spinoso MR, Progida C, Talà A, Cogli L, Alifano P, Bucci C. 2007. The *Neisseria*  
714 meningitidis capsule is important for intracellular survival in human cells. *Infect Immun*  
715 75(7):3594-603.
- 716 40. Wieland K, Chhatwal P, Vonberg RP. 2018. Nosocomial outbreaks caused by  
717 *Acinetobacter baumannii* and *Pseudomonas aeruginosa*: results of a systematic review.  
718 *Am J Infect Control* 46(6):643-648.
- 719 41. Pettis GS, Mukerji AS. 2020. Structure, function, and regulation of the essential virulence  
720 factor capsular polysaccharide of *Vibrio Vulnificus*. *Int J Mol Sci* 21(9):3259.

- 721 42. Wilson JW, Schurr MJ, LeBlanc CL, Ramamurthy R, Buchanan KL, Nickerson CA. 2002.  
722 Mechanisms of bacterial pathogenicity. *Postgrad Med J* 78(918):216-24.  
723
- 724 43. Geisinger E, Isberg RR. 2015. Antibiotic modulation of capsular exopolysaccharide and  
725 virulence in *Acinetobacter baumannii*. *PLoS Pathog* 11(2):e1004691.
- 726 44. Martí S, Rodríguez-Baño J, Catel-Ferreira M, Jouenne T, Vila J, Seifert H, Dé E. 2011.  
727 Biofilm formation at the solid-liquid and air-liquid interfaces by *Acinetobacter* species.  
728 *BMC Res Notes* 4:5.
- 729 45. Liu Y, Leung SSY, Guo Y, Zhao L, Jiang N, Mi L, Li P, Wang C, Qin Y, Mi Z, Bai C, Gao  
730 Z. 2019. The capsule depolymerase Dpo48 rescues *Galleria mellonella* and mice  
731 from *Acinetobacter baumannii* systemic infections. *Front Microbiol* 10:545.
- 732 46. Lin H, Paff ML, Molineux IJ, Bull JJ. 2017. Therapeutic Application of Phage Capsule  
733 Depolymerases against K1, K5, and K30 Capsulated *E. coli* in Mice. *Front Microbiol*  
734 8:2257
- 735 47. Dunsing V, Irmischer T, Barbirz S, Chiantia S. 2019. Purely polysaccharide-based biofilm  
736 matrix provides size-selective diffusion barriers for nanoparticles and bacteriophages.  
737 *Biomacromolecules* 20(10):3842-3854
- 738 48. Sweeney E, Sabnis A, Edwards AM, Harrison F. 2020. Effect of host-mimicking medium  
739 and biofilm growth on the ability of colistin to kill *Pseudomonas aeruginosa*.  
740 *Microbiology (Reading)* 166(12):1171-1180
- 741 49. Peleg AY, Jara S, Monga D, Eliopoulos GM, Moellering RC Jr, Mylonakis E. 2009.  
742 *Galleria mellonella* as a model system to study *Acinetobacter baumannii* pathogenesis  
743 and therapeutics. *Antimicrob Agents Chemother* 53(6):2605-9.
- 744 50. Yang H, Chen G, Hu L, Liu Y, Cheng J, Li H, Ye Y, Li J. 2015. In vivo activity of  
745 daptomycin/colistin combination therapy in a *Galleria mellonella* model of *Acinetobacter*  
746 *baumannii* infection. *Int J Antimicrob Agents* 45(2):188-91.
- 747 51. Blasco L, Ambroa A, Trastoy R, Bleriot I, Moscoso M, Fernández-García L,  
748 Pérez-Nadales E, Fernández-Cuenca F, Torre-Cisneros J, Oteo-Iglesias J, Oliver A,  
749 Canton R, Kidd T, Navarro F, Miró E, Pascual A, Bou G, Martínez-Martínez L, Tomas M.  
750 2020. In vitro and in vivo efficacy of combinations of colistin and different endolysins  
751 against clinical strains of multi-drug resistant pathogens. *Sci Rep* 28;10(1):7163.
- 752 52. Kay S, Edwards J, Brown J, Dixon R. 2019. *Galleria mellonella* infection model  
753 identifies both high and low lethality of *Clostridium perfringens* toxigenic strains and their  
754 response to antimicrobials. *Front Microbiol* 10:1281
- 755 53. Popova AV, Shneider MM, Arbatsky NP, Kasimova AA, Senchenkova SN, Shashkov AS,  
756 Dmitrenok AS, Chizhov AO, Mikhailova YV, Shagin DA, Sokolova OS, Timoshina OY,  
757 Kozlov RS, Miroshnikov KA, Knirel YA. 2020. Specific interaction of  
758 novel *Friunavirus* phages encoding tailspike depolymerases with  
759 corresponding *Acinetobacter baumannii* capsular types. *J Virol* 95(5):e01714-20.
- 760 54. Wilson C, Lukowicz R, Merchant S, Valquier-Flynn H, Caballero J, Sandoval J, Okuom  
761 M, Huber C, Brooks TD, Wilson E, Clement B, Wentworth CD, Holmes AE. 2017.  
762 Quantitative and qualitative assessment methods for biofilm growth: a mini-review. *Res*  
763 *Rev J Eng Technol* 6(4).
